1 **Title:** Augmenting biologging with supervised machine learning to study *in situ* behavior of the  
2 medusa *Chrysaora fuscescens*

3 **Running title:** Jellyfish behavior via machine learning

4 **Authors:** Clara Fannjiang,<sup>1,2</sup> T. Aran Mooney,<sup>3</sup> Seth Cones,<sup>3</sup> David Mann,<sup>4</sup> K. Alex Shorter,<sup>5</sup> Kakani  
5 Katija<sup>1</sup>

6 **Affiliations:**

7 1. Research and Development, Monterey Bay Aquarium Research Institute, Moss Landing,  
8 CA, USA

9 2. Electrical Engineering and Computer Sciences, University of California, Berkeley,  
10 Berkeley, CA, USA

11 3. Biology Department, Woods Hole Oceanographic Institution, Woods Hole, MA, USA

12 4. Loggerhead Instruments, FL, USA

13 5. Department of Mechanical Engineering, University of Michigan, Ann Arbor, MI, USA.

14 **Corresponding author:** [clarafy@berkeley.edu](mailto:clarafy@berkeley.edu)

15 **Key words:** biologging, accelerometry, machine learning, zooplankton, jellyfish behavior

16 **Summary Statement**

17 High-resolution motion sensors paired with supervised machine learning can be used to infer  
18 fine-scale *in situ* behavior of zooplankton for long durations.

19 **Abstract**

20 Zooplankton occupy critical roles in marine ecosystems, yet their fine-scale behavior remains  
21 poorly understood due to the difficulty of studying individuals *in situ*. Here we combine  
22 biologging with supervised machine learning (ML) to demonstrate a pipeline for studying *in situ*  
23 behavior of larger zooplankton such as jellyfish. We deployed the ITAG, a biologging package  
24 with high-resolution motion sensors designed for soft-bodied invertebrates, on 8 *Chrysaora*  
25 *fuscescens* in Monterey Bay, using the tether method for retrieval. Using simultaneous video  
26 footage of the tagged jellyfish, we develop ML methods to 1) identify periods of tag data  
27 corrupted by the tether method, which may have compromised prior research findings, and 2)  
28 classify jellyfish behaviors. Our tools yield characterizations of fine-scale jellyfish activity and  
29 orientation over long durations, and provide evidence that developing behavioral classifiers on *in*  
30 *situ* rather than laboratory data is essential.

## 31 **Introduction**

32 As anthropogenic impacts continue to alter the oceans, understanding the role movement and  
33 behavior play in how marine animals respond is required for effective stewardship and  
34 conservation. Researchers have made great strides in investigating marine megafauna behavior  
35 related to long distance migrations (Block et al., 2011; Rasmussen et al., 2007; Sequeira et al.,  
36 2018) and foraging strategies (Sims et al., 2008; Weise et al., 2010). However, the behavior of  
37 more numerous, higher total-biomass, lower trophic-level animals like zooplankton is much less  
38 understood. Early attempts to investigate *in situ* behavior of zooplankton such as jellyfish relied  
39 on scuba divers following animals with hand-held video cameras (Colin and Costello, 2002;  
40 Costello et al., 1998) and later with remotely operated vehicles (ROVs; Kaartvedt et al., 2015;  
41 Purcell, 2009; Rife and Rock, 2003). Acoustic methods have also been used to describe  
42 large-scale movement patterns of jellyfish (Båmstedt et al., 2003; Kaartvedt et al., 2007; Klevjer et  
43 al., 2009); however, these methods can be resolution-limited.

44 A promising alternative is biologging, where electronic transmitters or loggers with  
45 environmental and motion sensors are affixed to organisms (Kooyman, 2004; Rutz and Hays,  
46 2009). Biologging has enabled a diverse array of marine vertebrate studies (Block et al., 2011;  
47 Goldbogen et al., 2006; Johnson and Tyack, 2003), while several technological challenges have  
48 hindered the widespread use of biologging to study gelatinous invertebrates like jellyfish. Their  
49 sensitivity to drag induces constraints on tag size, shape, and buoyancy (Fossette et al., 2016;  
50 Mills, 1984; Mooney, Katija, Shorter et al., 2015), which, coupled with bandlimited transmission  
51 capabilities, often restricts sensor payloads to low-resolution depth or location pingers (Honda et  
52 al., 2009; Moriarty et al., 2012; Seymour et al., 2004). As a result, very few studies have  
53 successfully deployed high-resolution motion sensors like accelerometers on jellyfish *in situ*  
54 (Fossette et al., 2015), and these adopted the “tether method” for retrieval (Fossette et al., 2016;  
55 Hays et al., 2008), where the tag is tethered to a surface float transmitting location. As tethering  
56 can restrict movement, it is unknown whether data collected in this manner is broadly  
57 representative of natural behavior. Furthermore, without validation from simultaneous observation  
58 of the tagged animal, interpretation of biologging data is easily biased (Brown et al., 2013; Jeantet  
59 et al., 2018).

60 Recently, techniques from supervised machine learning, which automatically fit or “learn”  
61 patterns that optimally distinguish categories, have been successfully used to classify behaviors  
62 in various marine vertebrates (Brewster et al., 2018; Jeantet et al., 2018; Ladds et al., 2016).

63 However, few studies develop their methods on ground-truthed *in situ* data, due to the difficulty  
64 of recording sustained observations of wild marine animals (Carroll et al., 2014). It is unknown  
65 whether classifiers developed on data from captive, controlled, or laboratory conditions are  
66 equally effective on data from natural environments (Carroll et al., 2014), a broader problem  
67 known as domain adaptation in machine learning (Pan and Yang, 2010; Zhang et al., 2013).

68 In this study, we demonstrate how to investigate fine-scale zooplankton behavior *in situ*  
69 by combining biologging advancements with supervised machine learning (ML) methods. We  
70 study the movements of the scyphomedusa *Chrysaora fuscescens* in Monterey Bay, CA, USA,  
71 using the ITAG, a biologging tag equipped with high-resolution motion sensors and engineered  
72 specifically for soft-bodied invertebrates (Mooney, Katija, Shorter et al., 2015). We use the tether  
73 method for retrieval and simultaneously record video footage of the tagged animals. We develop  
74 classifiers using the resulting data to 1) detect when the tether method influences jellyfish  
75 behavior, and 2) distinguish swimming from drifting. We provide principled estimates of the  
76 classifier error characteristics, which allow us to remove behavioral data influenced by tethering,  
77 and estimate the fine-scale *in situ* orientation and swimming activity of *C. fuscescens* individuals  
78 for up to 10 h. By combining a highly specialized tag with supervised ML, our approach is the first  
79 complete pipeline for acquiring and interpreting high-resolution motion data from individual  
80 jellyfish or other zooplankton *in situ*.

## 81 **Methods & Materials**

### 82 **Laboratory Deployments**

83 Laboratory investigations of jellyfish tagging were conducted at the Monterey Bay Aquarium  
84 Research Institute (MBARI) in Moss Landing, CA in the spring of 2018. Four jellyfish (*Chrysaora*  
85 *fuscescens*) with bell diameters ranging from 16 to 25 cm were collected in Monterey Bay from  
86 R/V Paragon (CADFW permit SC-13337) and kept in plastic bags filled with unfiltered seawater.  
87 Within 4 hours of collection, animals were transported into large holding tanks in a 5° C cold room  
88 in MBARI's Seawater Lab. Experiments were conducted in MBARI's Test Tank, a 275,000 gallon  
89 tank with dimensions of 13 m (L) x 10 m (W) x 10 m (D). Animals were transported from the  
90 Seawater Lab in plastic bags and placed in the Test Tank to acclimate for at least an hour prior to  
91 tagging trials. After acclimation, a neutrally buoyant bio-logging tag (ITAG v0.4; Mooney, Katija,  
92 Shorter et al., 2015) was prepared for attachment. The ITAG (6.3 cm x 2.9 cm x 1.6 cm, air weight  
93 30 g) is equipped with a triaxial accelerometer, gyroscope, and magnetometer synchronously



94 sampling at a rate of 100 Hz (TDK Invensense MPU9250, San Jose, CA, USA), and pressure,  
95 temperature (TE Connectivity MS5803, Schaffhausen, Switzerland), and light sensors (Intersil  
96 ISL29125, Milpitas, CA, USA) sampling at 1 Hz. The tag was attached to the animal's aboral  
97 surface using veterinary-grade tissue adhesive (3M Vetbond, Maplewood, Minnesota, USA),  
98 following the "glue method" (Fossette et al., 2016). Care was taken to center the attachment site  
99 on the bell apex between the four gonads, so that the tag axis conventions aligned with the  
100 jellyfish, and the animal's radial symmetry was not disrupted. The entire attachment procedure  
101 took no longer than 2 minutes.

102 To replicate the *in situ* recovery strategy, the tags were attached by 6 m of monofilament  
103 line (20-lb. test) to a suspended walkway about 1 m above the tank surface (the tether length was  
104 set to prevent the animal from getting tangled with metal bars on the walls of the test tank).  
105 Simultaneous lateral-view video footage of the tagged jellyfish was collected with a HERO5 Black  
106 GoPro (GoPro, Inc., San Mateo, CA, USA) mounted onto a BlueROV2 (Blue Robotics, Torrance,  
107 CA, USA). Footage was synchronized with the tag data by sharply tapping the tag five times in  
108 front of the GoPro prior to attachment.

## 109 **Field Deployments**

110 We deployed ITAGs on 8 *C. fuscescens* in Monterey Bay, CA in late spring of 2018, and collected  
111 *in situ* recordings with durations between 54 min and 10 h. The bell diameters of these animals  
112 were between 20 and 28 cm. Fig. 1A-G depicts the main phases of the deployment protocol.  
113 Each animal was first spotted from aboard the R/V Paragon, which then maneuvered next to the  
114 animal so it could be gently captured and brought aboard using a plastic bucket. Captured  
115 jellyfish were then transferred into individual 27-gallon plastic holding tubs filled with seawater  
116 (Fig. 1A), with care taken to not introduce air bubbles under their bells. To recover tags at the end  
117 of the deployment, we used the "tether method" (Fossette et al., 2016): tags were tethered by 30  
118 m of monofilament line to the bottom of a drogue, which was attached by dock line to a surface  
119 drifter. A fishing swivel was placed at the midpoint of the tether, as well as immediately below its  
120 attachment to the drogue, to prevent any tether torsion from affecting the animal. The surface  
121 drifter consisted of PVC housing for a SPOT GPS tracking device (SPOT LLC, Milpitas, CA, USA),  
122 and a PVC pipe chamber containing batteries and ballasting material. The SPOT was configured  
123 to report its coordinates once every 15-20 minutes via email. The tethered tags were then affixed  
124 to jellyfish while in the holding tubs, following the aforementioned glue method also used for

125 laboratory deployments (Fig. 1B-C). In order, the drogued drifter, ROV, and finally tagged jellyfish  
126 were then released (Fig. 1D-F, respectively). The drogue was centered at a depth down to 9 m  
127 (see Table S1), and the jellyfish could therefore swim freely down to a depth between 30 and 39  
128 m. From pilot control on the deck, we used the ROV-mounted GoPro to track and record video  
129 footage of the tagged animal, until losing sight of it due to water turbidity and/or turbulence.  
130 Once visual contact with the tagged animal was lost, the ROV was recovered, and the tagged  
131 animals tethered to the drogued drifters were left behind.

132 Tags were retrieved the next morning after deployment. The Paragon was navigated to  
133 the most recent coordinates reported by the SPOT, and once the drifter and drogue were  
134 located, the drifter, drogue, and tag (with or without an animal still attached) were recovered. Data  
135 from the tag was then brought back to shore for analysis.

## 136 **Orientation Estimation**

137 We defined axes conventions appropriate for the typical jellyfish swimming position (see Fig. 1H),  
138 according to which the ITAG pressure sensor and triaxial accelerometer, gyroscope, and  
139 magnetometer were calibrated from bench tests. Since we have control over the tag attachment  
140 site, we can ensure that the tag x-axis (surge direction) is orthogonal to the jellyfish bell at the  
141 apex, so no further data processing is necessary to align the tag and jellyfish axes.

142 In order to compute orientation from the accelerometer and magnetometer signals, we  
143 first used a finite impulse response filter to smooth the accelerometer and magnetometer data  
144 (Sato et al., 2003). The filter cut-off frequency was set to 0.2 Hz, within the typical range of  
145 0.25-0.5 of the pulse frequency (Martín López et al., 2016) of about 0.6 Hz estimated for a  
146 *Chrysaora* species (Matanoski et al., 2001). Filtering the accelerometer data separates the signal  
147 due to gravity (static acceleration, SA) from high-frequency animal-generated forces (dynamic  
148 acceleration or DA; Wilson et al., 2006), which we later process and featurize for behavioral  
149 classification. The resulting SA was then combined with the smoothed magnetometer data to  
150 calculate orientation (Euler angles of heading, pitch, and roll) at every point in time, according to  
151 trigonometric relationships (Johnson and Tyack, 2003). Based on our axes conventions in Fig. 1A,  
152 heading refers to compass bearing from true north, positive pitch means the jellyfish bell apex is  
153 tilted upward with respect to the horizon, and positive roll means the jellyfish bell is rotating  
154 around its apex counterclockwise, when viewed facing the bell.

## 155 **Annotation of Video Data**

156 Throughout this paper, we refer to tag data paired with annotated simultaneous video footage as  
157 annotated data, and tag data after video footage ended as unannotated data.

158 Laboratory and *in situ* video footage was manually annotated for jellyfish behavior and  
159 tether influence. Each second of footage was labeled according to whether the jellyfish was  
160 swimming or drifting (not actively pulsing its bell), and whether the tether was slack (i.e. when the  
161 animal was uninfluenced by tether tension) or taut (i.e. when the animal was influenced by tether  
162 tension). For *in situ* deployments, if the tether could not be clearly seen or was out of view due to  
163 turbidity and/or viewing angle (e.g. facing the subumbrella), the state of the tether was annotated  
164 as unknown. Similarly, if the jellyfish behavior could not be distinguished due to lighting or  
165 turbidity, the behavior was annotated as unknown. Any segments of footage where either the  
166 tether state or jellyfish behavior were unknown were excluded from training data for the methods  
167 we describe below.

## 168 **Jellyfish Behavior Classification**

169 When using the tether method as a tag retrieval strategy, prolonged deviations between the  
170 trajectories of the jellyfish and its tethered drifter can result in the tether pulling on the tag. These  
171 forces leave measurable signatures in the motion sensor data, which are distinct from the signals  
172 generated by the jellyfish's natural behavior. Our goal was to develop supervised machine  
173 learning methods to 1) detect and remove segments of data corrupted by tether influence (tether  
174 influence classification), and 2) distinguish swimming from drifting on the remaining data (activity  
175 classification). In the following sections, we describe how these methods were developed.

## 176 **Data Preprocessing**

177 *In situ* data was first split into two pools. Annotated data was processed and featurized as  
178 described below, then set aside for model training and evaluation. Unannotated data was  
179 similarly processed and featurized, and then set aside for classification by the trained models.  
180 Laboratory data was completely annotated, since we were able to capture video footage of the  
181 entire deployment.

182 We used the following procedure to assemble data samples for each of the four  
183 categories annotated as described above: tether-influenced, uninfluenced, swimming, and  
184 drifting. Upon visual inspection, the DA of every deployment displayed a nearly constant periodic

185 nature, consistent with the nearly constant jellyfish bell pulsing observed in both the laboratory  
186 and *in situ* video footage. We therefore computed the discrete cosine transform (DCT) of the DA  
187 and took the frequency with the maximum absolute coefficient as the representative pulse  
188 frequency (RPF) for each deployment.

189 For each category, we extracted all segments of motion sensor data whose  
190 corresponding video footage was annotated with that category. Each segment, which consisted  
191 of 10 channels of data (pressure sensor and triaxial accelerometer, gyroscope, and  
192 magnetometer) was then split into consecutive, non-overlapping windows with a duration equal  
193 to the representative swimming cycle length (the reciprocal of the RPF). Segments shorter than  
194 this duration, and trailing windows at the ends of segments shorter than this duration, were  
195 discarded from classification and analysis. Each of these windows, which we refer to as periods,  
196 was then featurized. Note that the period duration is different for each deployment, to account for  
197 the pulse frequency of each animal.

## 198 **Featurization**

199 For each period, we generated a total of 46 candidate features from the accelerometer and  
200 gyroscope. During training, we used a feature selection method to select a subset with the  
201 greatest predictive power, as described below. In the following, triaxial jerk was calculated as the  
202 difference between consecutive triaxial accelerometry values, scaled by the sample rate of 100  
203 Hz. Similarly, angular acceleration was calculated as the difference between consecutive  
204 gyroscope values, scaled by the sample rate.

205 We computed various features of partial dynamic body acceleration, or PDBA, the sum of  
206 the absolute values of the y- and z-axis of DA. PDBA is a variant of overall dynamic body  
207 acceleration (ODBA; Wilson et al., 2006), which is used extensively as a proxy for energetic input  
208 (Halsey et al., 2009; Wilson et al., 2006). By computing both PDBA and the absolute value of the  
209 x-axis of DA (DAX), we can separate energy expenditure in the direction of jellyfish propulsion  
210 from movements in the orthogonal plane (i.e. the x-axis from the y-z plane in Fig. 1H). To account  
211 for variation in propulsion force between individual jellyfish, for each jellyfish we divided the  
212 PDBA and DAX by their respective averages over the entire deployment. Analogous to PDBA and  
213 DAX, for the gyroscope data we considered the norm of the y- and z-axis (which we call partial  
214 vectorial angular velocity, or PVAV), and the absolute value of the x-axis (AVX).

215 Accelerometer-based features included the maximum, mean, and standard deviations of  
216 the following quantities: DAX, PDBA, the absolute value of the x-axis of jerk, and the norm of the

217 y- and z-axes of jerk. Spectral features were the sparsities of DAx and PDBA spectra (the absolute  
218 value of the Fourier transform), as measured by the Gini index (Hurley and Rickard, 2009;  
219 Zonoobi et al., 2011) and the spectral energies of DAx and PDBA in 0.2-1.0 Hz (roughly the typical  
220 range of pulse frequencies) and 1-8 Hz. We also included the spectral energy of DAx over 8 Hz  
221 but excluded it for PDBA, because the two were too highly correlated, leading to numerically  
222 unstable covariance matrix inversions in our model. The remaining features were the number of  
223 peaks in the DAx and PDBA, as identified by a peak-detection method (Duarte, 2013), the  
224 correlation between the y- and z-axes of DA, and the average of the correlations between the x-  
225 and y-axes and x- and z-axes of DA.

226 The gyroscope-based features were completely analogous to the accelerometer-based  
227 features, substituting AVx, PVAV, and angular acceleration for DAx, PDBA, and jerk above,  
228 respectively.

229 We also computed the maximum normalized ODBA per period for behavioral analysis,  
230 where, similarly to PDBA and DAx, we first divided the ODBA signal by the average ODBA over  
231 the deployment to accommodate differences in propulsion strength between individual jellyfish.  
232 However, it wasn't included as a classification feature due to redundancy with PDBA and DAx.

### 233 **Training Data**

234 The video footage showed that the nature of tether influence was fundamentally different  
235 between *in situ* and laboratory deployments. In the test tank, the jellyfish simply turned slightly  
236 whenever it reached the end of the tether, whereas tether influence *in situ* took the form of sharp  
237 yanking or prolonged dragging on the jellyfish. Since our end goal was to detect tether influence  
238 *in situ*, and the nature of *in situ* tether influence was not replicated in laboratory footage, we only  
239 trained and evaluated the tether influence classifier on *in situ* data.

240 For training the tether-influence classifier, the annotated *in situ* data yielded 325 s of  
241 tether-influenced behavior and 2825 s of uninfluenced behavior across all deployments. Splitting  
242 this data into periods produced 83 and 1245 periods of influenced and uninfluenced data,  
243 respectively. For training the activity classifier, the annotated laboratory data yielded 366 s (68  
244 periods) and 9201 s (3069 periods) of uninfluenced drifting and uninfluenced swimming behavior,  
245 respectively, and the annotated *in situ* data yielded 79 s (17 periods) and 2740 s (1228 periods) of  
246 uninfluenced drifting and uninfluenced swimming behavior, respectively. Since only 17 periods of  
247 uninfluenced *in situ* drifting were observed, we trained the activity classifier on the combined *in*  
248 *situ* and laboratory data (85 and 4297 periods of drifting and swimming, respectively) to

249 sufficiently capture drifting behavior. To assess the value of incorporating *in situ* data for training,  
250 we also trained the classifier solely on the laboratory data.

## 251 **Classification Methods**

### 252 *Quadratic Discriminant Analysis*

253 For both tether influence and activity classification, we trained a supervised machine learning  
254 method known as quadratic discriminant analysis (QDA; Hastie et al., 2009), a generalization of  
255 the classical linear discriminant analysis method introduced by Fisher (Fisher, 1936; Hastie et al.,  
256 2009). QDA models each category in feature space as a multivariate normal distribution with an  
257 individual mean and individual covariance matrix. That is, let  $x \in R^p$  denote the feature vector,  
258 where  $p$  is the number of features, and let  $y \in \{0, 1\}$  denote the categorical label (e.g.  
259 swimming vs. drifting for the activity classifier). For convention, we let category 1 refer to the  
260 minority (less frequent) category, i.e. uninfluenced for tether-influence classification and drifting  
261 for activity classification. The data is then modeled as

$$262 \quad y \in \text{Bernoulli}(\alpha)$$

$$263 \quad x | y = 0 \sim N(\mu_0, \Sigma_0)$$

$$264 \quad x | y = 1 \sim N(\mu_1, \Sigma_1)$$

265 where  $\mu_0, \mu_1 \in R^p$  and  $\Sigma_0, \Sigma_1 \in R^{p \times p}$  are the mean and covariance matrix parameters,  
266 respectively, and  $\alpha \in [0, 1]$  is the probability of category 1 occurring, known as the class prior.  
267 We fit the model by computing the maximum likelihood estimates (MLE) for  $\mu_0, \mu_1, \Sigma_0, \Sigma_1$ , and  $\alpha$ ,  
268 which are simply the sample means and sample covariances of the categories, and the  
269 proportion of category 1 in the training set. Under this model, QDA then classifies a new instance  
270 to the category  $\hat{y}$  that maximizes the conditional probability  $p(\hat{y} | x)$  (the category that is most  
271 likely given the features), which can be accessed via Bayes' rule. As the name implies, the  
272 resulting decision boundaries in feature space are quadratic curves. Due to the simplicity of the  
273 model and closed-form nature of the MLE, QDA is both easy to interpret and fast to train.

### 274 *Feature Selection*

275 There is often a large number of candidate features one can consider for a classifier. Principled  
276 methods for choosing an optimal subset of these features can help produce classifiers that  
277 perform better (due to the removal of noisy, irrelevant, or redundant features), are faster and

278 cheaper to use (since fewer feature need to be measured and processed), and are more  
279 interpretable (Dash and Liu, 1997; Guyon and Elisseeff, 2003; Liu and Motoda, 1998). Under the  
280 broader umbrella of model selection, feature selection encourages finding the simplest model  
281 that explains the data, a principle that is critical for performance generalization (Hastie et al.,  
282 2009; MacKay, 2003). We first manually generated the list of 46 candidate features described  
283 above from accelerometer and gyroscope data. As part of training, we use a popular greedy  
284 heuristic known as sequential forward selection (SFS; Whitney, 1971), which starts with an empty  
285 subset of features and iteratively adds the next feature whose inclusion to the existing subset  
286 improves some evaluation metric the most. Despite its simplicity, SFS has been shown to match  
287 or outperform more complex search methods by being less prone to overfitting (Reunanen,  
288 2003).

### 289 *Metric for Feature Selection*

290 In choosing an evaluation metric for SFS, we observed that our video annotations showed highly  
291 skewed category distributions for both classification tasks: tether-influenced periods and drifting  
292 were observed far less often than uninfluenced periods and swimming, respectively. In this case,  
293 the common metric of accuracy loses meaning, since the accuracy of a simple majority decision  
294 rule (i.e. always predict the majority categories, influenced and swimming) is high even though 1)  
295 the features are not considered and 2) all instances of the minority category are misclassified.  
296 Regardless of category imbalance, the evaluation metric should reflect how well a classifier  
297 extracts discriminating information from the features, and should account for the balance of false  
298 positives and false negatives on the minority category.

299 In particular, consider precision and recall on the minority category, defined as

$$300 \text{precision} = \frac{TP}{TP + FP}$$

$$301 \text{recall} = \frac{TP}{TP + FN}$$

302 where  $TP$  denotes the number of true positives, or minority category periods correctly classified  
303 as the minority category;  $FP$  denotes the number of false positives, or majority category periods  
304 incorrectly classified as the minority category; and  $FN$  denotes the number of false negatives, or  
305 minority category periods incorrectly classified as the majority category. Given a trained  
306 probabilistic model of the data, such as the one posed by QDA, the decision rule to classify an  
307 instance as category 1 can be formulated in terms of a threshold on the probability  $p(y = 1 | x)$ .  
308 Varying this threshold exposes an inherent trade-off between precision and recall: a decision rule



309 with a high threshold, which only selects the category given overwhelmingly high evidence,  
310 tends to achieve higher precision at the cost of lower recall. A decision rule with a lenient  
311 threshold, which liberally selects the category given only mild evidence, tends to achieve higher  
312 recall at the cost of lower precision. This trade-off is captured by the curve in precision-recall  
313 space (PR curve) generated by decreasing the decision threshold from 1 to 0, which is often used  
314 to characterize classifier performance on tasks with skewed category distributions (Bunescu et  
315 al., 2005; Davis and Goadrich, 2006; Fawcett, 2006; Manning and Schütze, 1999). The PR curve  
316 allows the analyst to choose an appropriate decision threshold, depending on the relative  
317 importance of precision and recall for the task at hand (Manning and Schütze, 1999).

318 We use the area under this curve (AUPRC) as the metric for feature selection, which  
319 provides a summary of performance across all possible thresholds (Boyd et al., 2013; Richardson  
320 and Domingos, 2006). The AUPRC ranges from 0 to 1, where an ideal classifier that suffers no  
321 trade-off has an AUPRC of 1, and a classifier no better than random guessing has an expected  
322 AUPRC of the proportion of the category in the dataset. During feature selection, we terminate  
323 SFS when the inclusion of the next feature fails to improve the AUPRC by at least 0.02.

#### 324 *Classifier Evaluation*

325 Unbiased evaluation of a classifier's performance on unseen data requires complete separation  
326 of the data used in the training and evaluation phases. The standard way to evaluate classifier  
327 performance is with  $k$ -fold cross-validation (CV; Hastie et al., 2009; Kohavi, 1995), in which the  
328 annotated dataset is split equally into  $k$  parts. For each part, a classifier is trained on the  
329 remaining  $k - 1$  parts (the training set) and evaluated on the excluded part (the validation set)  
330 using some evaluation metric, and the average of the resulting  $k$  evaluation scores (the CV score)  
331 is used as an estimate of the method's evaluation score on unseen data. Since we want to take  
332 full advantage of our annotated dataset for training, a final classifier can then be trained on the  
333 complete dataset and deployed for future predictions (Cawley and Talbot, 2010; Varma and  
334 Simon, 2006).

335 Note that during evaluation, the training phase must include all aspects of model  
336 selection, including feature selection and choosing hyperparameter values. However, these  
337 aspects are sometimes incorrectly treated as external to the training process: performing  
338 hyperparameter and/or feature selection on the complete dataset, prior to CV, can result in  
339 dramatic inflations of the CV score (Ambroise and McLachlan, 2002; Cawley and Talbot, 2010;  
340 Smialowski et al., 2010; Varma and Simon, 2006). To remove this selection bias, for each of the  $k$



341 iterations of CV, we perform feature selection solely on the training set using an “inner” CV  
342 (Ambroise and McLachlan, 2002; Varma and Simon, 2006). That is, the training set is itself split  
343 evenly into  $k$  parts, and for each iteration of SFS, each candidate feature is evaluated by 1) adding  
344 it to the current feature subset, 2) training QDA with those features and evaluating it on the  $k$   
345 pairs of training and validation sets, and 3) averaging those  $k$  evaluation scores. The feature with  
346 the best inner CV score is then selected. After SFS has terminated, we use the finalized feature  
347 subset to train and evaluate QDA on the outer CV training and validation set. For both the inner  
348 and outer CV, we take  $k = 5$ .

349         After the outer CV is complete, we report the average and standard error (SE) of the  $k$   
350 AUPRC values. We then use the average of the  $k$  PR curves to choose a decision threshold  
351 (Fawcett, 2006). For the purposes of demonstrating our methods, we prioritize precision and  
352 recall equally, and simply choose the threshold value out of  $\{0.1, 0.2, \dots, 0.9\}$  that yields the  
353 closest precision and recall. We call this the equal error rate threshold (Duda et al., 2000) and  
354 report the CV precision, recall, and accuracy for this classifier. For future studies that prioritize  
355 either precision or recall over the other, the researcher can use the average PR curve to pick a  
356 threshold that achieves the desired trade-off (Manning and Schütze, 1999; Duda et al., 2000;  
357 Fawcett, 2006).

### 358 *Activity Classifier Baselines*

359 To see if our featurization and feature selection approach improved activity classification beyond  
360 simpler alternatives, we trained and evaluated two baseline classifiers. The first baseline, which  
361 we refer to as ODBA thresholding, simply classifies a period as swimming if the mean normalized  
362 ODBA is above some decision threshold. Since ODBA is often used as a proxy for energetic  
363 expenditure, intuition would suggest it should be sufficient for discriminating swimming from  
364 drifting in a noiseless scenario. The second baseline follows our method but only uses  
365 accelerometry features, excluding features from the gyroscope data.

### 366 *In Situ Behavior Prediction*

367 After training and evaluating the classifiers, we used them to predict tether influence and activity  
368 on the unannotated *in situ* data. After removing any periods classified as tether-influenced, we  
369 then classified each remaining uninfluenced period as swimming or drifting. These classifications  
370 provide estimates of 1) how often the tether method interferes with the natural movements of

371 jellyfish, and 2) how much time jellyfish spend swimming versus drifting *in situ* over long  
372 durations.

### 373 **Orientation Change**

374 To assess change in orientation during swimming, we computed the difference in heading, pitch,  
375 and roll angles between start and end of each non-excluded period. We converted these  
376 differences into a non-negative total angle of rotation (Diebel 2006), which we refer to as  
377 orientation change over a period. We also used circular mean and circular standard deviation to  
378 compute the average and standard deviation of heading, pitch, and roll angles over periods.

379 To avoid ill-defined heading and roll values due to gimbal lock, here we excluded periods  
380 where the absolute pitch angle exceeded 70° from the following analysis (this removed 0.7% of  
381 total laboratory and *in situ* periods).

### 382 **Statistical Tests**

383 We ran several statistical tests on the annotated data to investigate potential distinctions  
384 between laboratory and *in situ* behavior, and between tether-influenced and uninfluenced  
385 behavior. For the following four tests, we used the nonparametric Mann-Whitney U test to avoid  
386 any distributional assumptions on the quantities of interest, and because we expected to have a  
387 considerably large sample size (each period constitutes only a few seconds of data). Specifically,  
388 we pooled tether-influenced periods and uninfluenced periods across the *in situ* deployments,  
389 and tested whether either group tends to exhibit 1) greater normalized ODBA and 2) greater  
390 orientation change than the other. We also tested these two hypotheses between laboratory and  
391 *in situ* data, by pooling together uninfluenced periods across the laboratory deployments and  
392 across the *in situ* deployments.

## 393 **Results**

### 394 **Laboratory and *In Situ* Deployments**

395 Fig. 2A shows drifter trajectories and timestamps for the 8 *in situ* deployments in the Monterey  
396 Bay, over three separate days (see Table S1 for laboratory and *in situ* deployment details). Video  
397 footage was successfully captured for 7 of these deployments, and annotated for activity and  
398 tether influence as summarized in Table S2 (see Movie S1 for examples of annotated footage).

399 Drifting behavior was observed in 5 deployments, and ranged from 0.5% to 4.3% of the time.  
400 Tether influence was also observed in 5 deployments (0.35% to 28.6%).

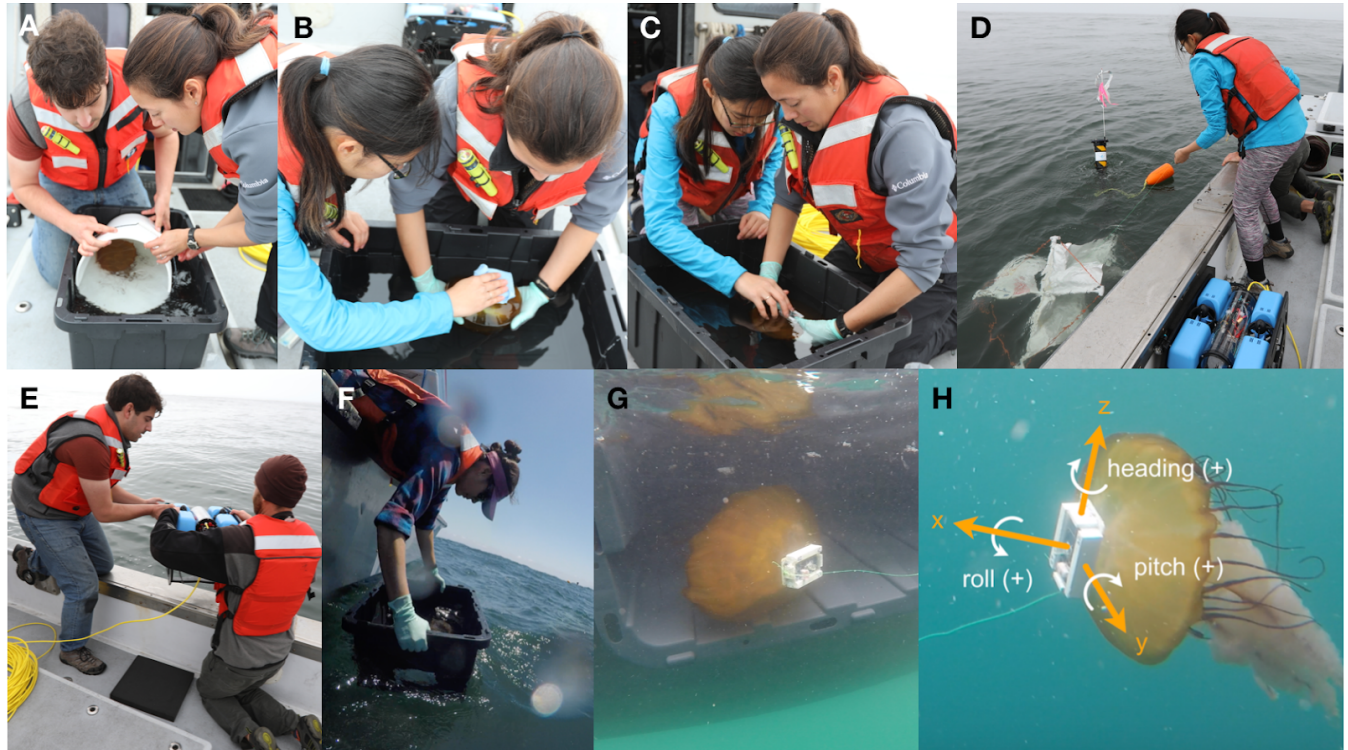

401 **Figure 1. Photos of the in situ protocol and tag axis definitions.** Protocol consisted of  
402 transferring collected jellyfish to staging tub (A), drying the attachment site with absorbent towels  
403 (B), gently affixing tethered ITAG with VetBond (C), deploying SPOT drifter and drogue (D),  
404 deploying BlueROV with mounted GoPro (E), and gently releasing tagged jellyfish and tracking it  
405 with the BlueROV (F-G). (H) Definitions for positive x, y, and z tag axes, and positive heading,  
406 roll, and pitch angle.



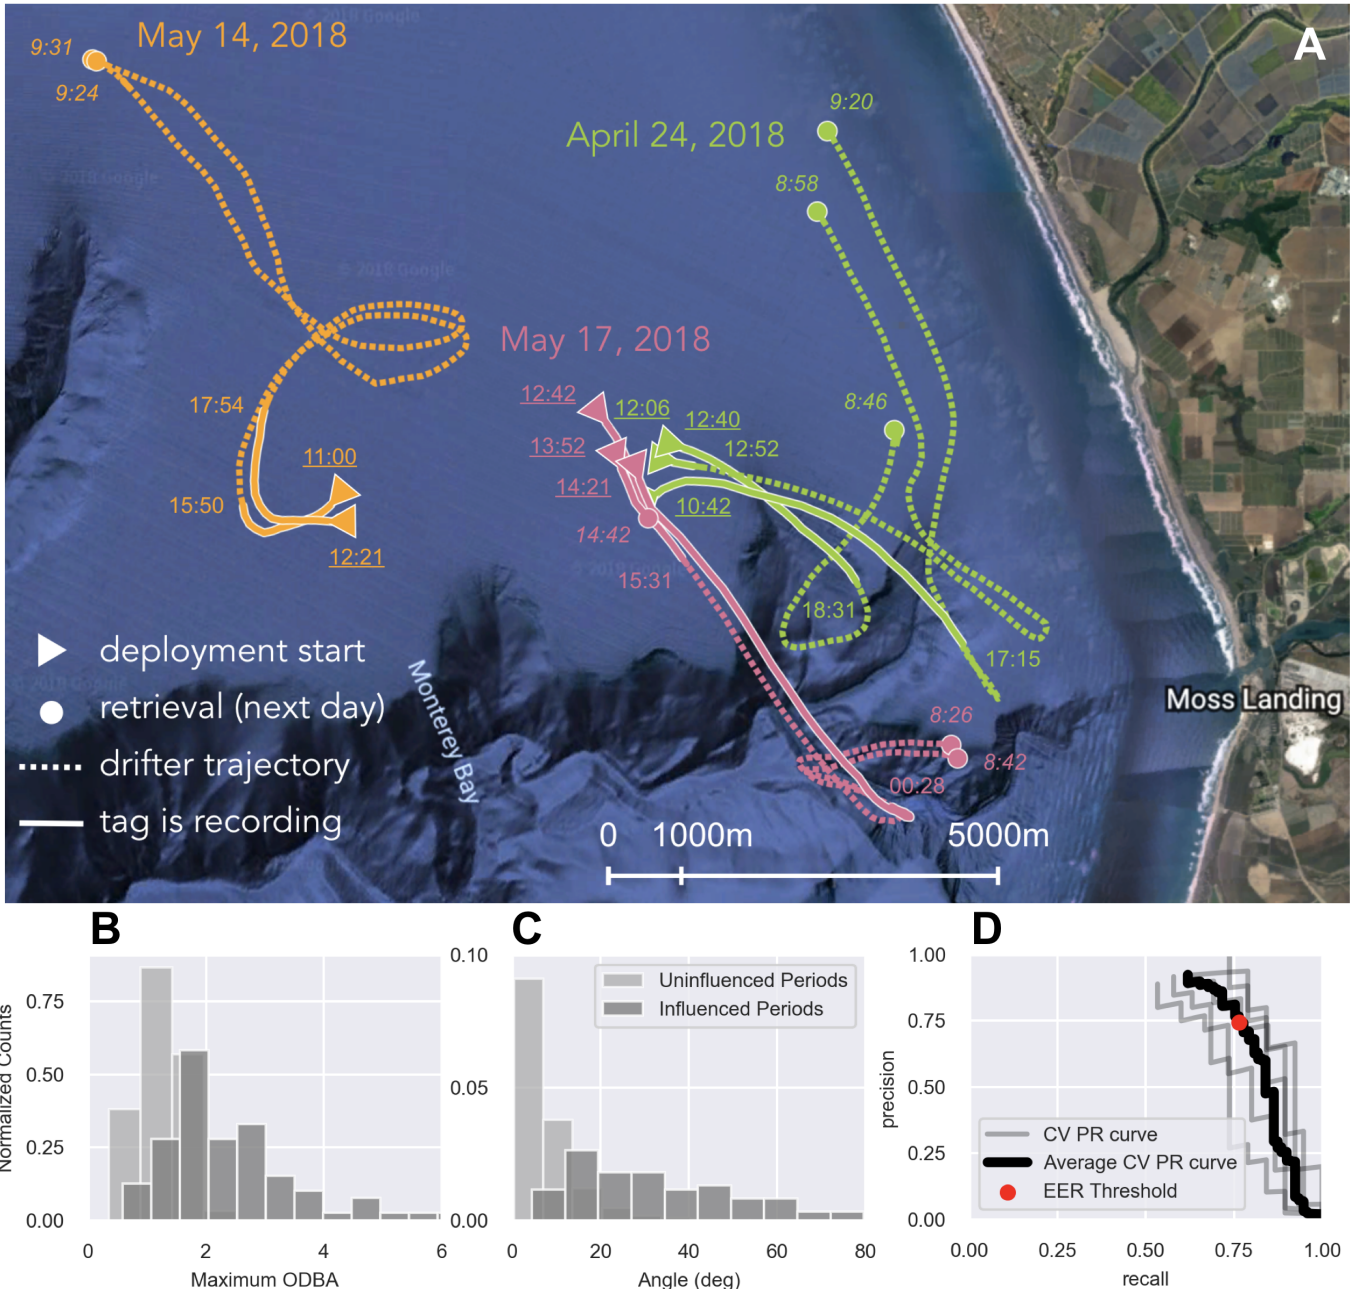

407 **Figure 2. *In situ* deployment trajectories, effects of tether influence, and precision-recall curve**  
408 **of activity classifier.** (A) Trajectories for the three deployment dates. Underlined times (PDT)  
409 denote deployment start; italicized times denote when tag was recovered; remaining times  
410 denote when tag stopped recording. (B) Maximum ODBA and (C) total orientation change over  
411 annotated tether-influenced and uninfluenced periods. (D) Cross-validation precision-recall  
412 curves of the activity classifier, and precision and recall using the equal error rate threshold.

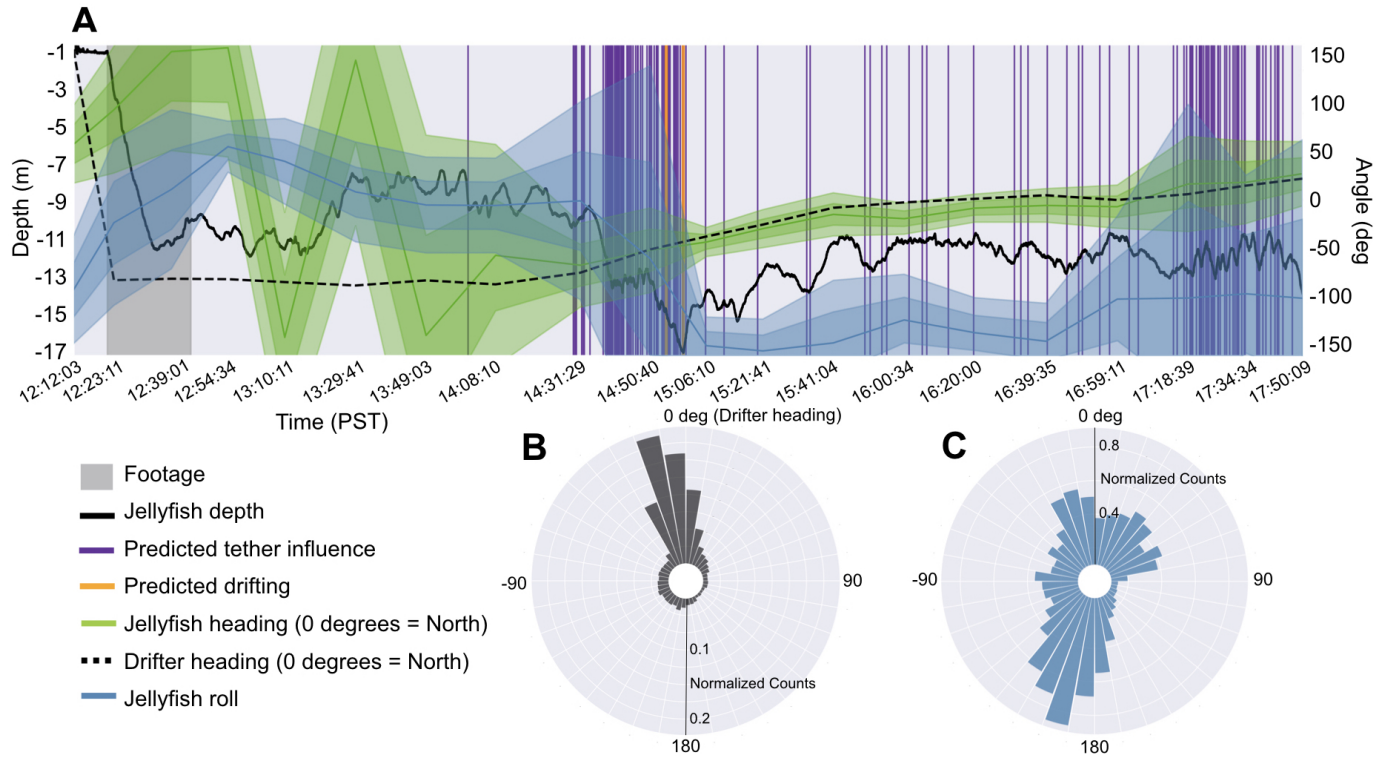

413 **Figure 3. Fine-scale orientation and predicted activity of deployment S2-2.** (A) Estimated  
414 heading and roll, and predicted tether influence and drifting, over entire deployment. Shaded  
415 regions denote one and two standard deviations around mean. Note that the 1-pixel-width vertical  
416 lines are disproportionately wide, as each predicted event only lasts a few seconds. (B) Radial  
417 histogram of jellyfish heading relative to the drifter heading at zero, and (C) jellyfish roll angle  
418 throughout deployment.

## 419 Jellyfish Behavior Classification

### 420 Jellyfish Behaviors Influenced by Tether

421 The tether-influence classifier had a cross-validation (CV) AUPRC of 0.860 (SE = 0.032), and using  
422 the equal error rate (EER) threshold had a CV precision of 86.1% (SE = 5.3%), recall of 73.5% (SE =  
423 3.8%), and accuracy of 97.6% (SE = 0.4%). In order of selection by SFS, the features were 1)  
424 spectral energy of DA<sub>x</sub> over 8 Hz, 2) mean y-z PD<sub>BA</sub>, 3) number of peaks in the y-z PD<sub>BA</sub>, and 4)  
425 max DA<sub>x</sub>. After these four, SFS found no additional features that appreciably improved  
426 performance.

427 We used the tether-influence classifier to classify each unannotated *in situ* period as  
428 influenced or uninfluenced. Table S3 shows the proportion of each deployment classified as  
429 influenced, which ranged from 3.3% to 35.1%.

430 To understand how the tether influenced *in situ* behavior, we evaluated how normalized  
431 ODBA and orientation change differed between annotated uninfluenced and influenced periods  
432 (Fig. 2B, C). The maximum normalized ODBA over influenced periods (median 2.05) tended to be  
433 larger than that of uninfluenced periods (median 1.27; Mann-Whitney U test, two-sided  $p < 1e-4$ ).  
434 Similarly, orientation change tended to be greater over influenced periods (median 30.8 degrees)  
435 than over uninfluenced periods (median 5.6 degrees; Mann-Whitney U test, two-sided  $p < 1e-4$ ).  
436 That is, jellyfish exhibited greater ODBA and more severe orientation changes when influenced  
437 by the tether.

### 438 **Jellyfish Swimming Activity**

439 The activity classifier had a CV AUPRC of 0.746 (SE = 0.047), and using the EER threshold had a  
440 CV precision of 74.3% (SE = 4.9%), recall of 76.4% (SE = 2.7%), and accuracy of 99.0% (SE = 0.1%).  
441 Fig. 2D demonstrates the average CV PR curve used to identify the EER threshold. The features,  
442 in order of selection by SFS, were 1) number of peaks in the PVAV, 2) sparsity of the PVAV  
443 spectrum, and 3) sparsity of the PDBA spectrum.

444 Note that since drifting occupied only 1.9% of the annotated periods, a simple majority  
445 prediction rule has an accuracy of 98.1%. The other metrics therefore give more insight into  
446 whether the classifier actually learns discriminative information about the categories, rather than  
447 simply which category is more common. In comparison to our method, the baseline of ODBA  
448 thresholding had an AUPRC of 0.585 (SE = 0.056) and, with the EER threshold, a precision of  
449 68.9% (SE = 9.3%), recall of 49.9% (SE = 3.5%), and accuracy of 98.6% (SE = 0.1%). Training our  
450 classifier without gyroscope features, and only with accelerometry features, gave an AUPRC of  
451 0.679 (SE = 0.027), and precision of 73.9% (SE = 4.6%), recall of 58.0% (SE = 7.8%), and accuracy of  
452 98.7% (SE = 0.1%) with the EER threshold.

453 We used our method to classify each unannotated *in situ* period as swimming or drifting,  
454 which provided estimates of how much time each jellyfish spent for each activity. We first  
455 removed periods predicted to be tether-influenced, so that our estimates are restricted to data  
456 representative of natural behavior. The proportion of uninfluenced time each jellyfish was  
457 classified as drifting ranged between 0% and 5.6% (Table S3), with the exception of deployment  
458 S1-1 (19.1%) which also experienced frequent tether influence (both annotated and predicted). We

459 can then combine the outputs of the influence classifier, activity classifier, and orientation  
460 estimation (again, restricted to periods predicted as uninfluenced) to visualize fine-scale  
461 information about *in situ* behavior over several hours (Fig. 3).

#### 462 **Classifier Trained on *In Situ* vs. Laboratory Data**

463 When trained and evaluated only on laboratory data, the activity classifier had a CV AUPRC of  
464 0.894 (SE = 0.067) and, using the EER threshold, precision of 87.4% (SE = 6.1%), recall of 90.3% (SE  
465 = 4.4%), and accuracy of 99.4% (SE = 0.2%). However, predictions made by this classifier on the  
466 annotated *in situ* data had an accuracy of 96.3%, precision of 0%, and recall of 0%. We emphasize  
467 that this means none of the periods classified as drifting were truly drifting, and none of the  
468 drifting periods were correctly classified. Similarly, ODBA thresholding had an optimistic AUPRC  
469 of 0.864 (SE = 0.047), precision of 78.2% (SE = 6.3%), recall of 81.1% (SE 4.0%), and accuracy of  
470 99.1% (SE = 0.1%) when CV was performed only on laboratory data. However, predictions on  
471 annotated *in situ* data had an accuracy of 90.8%, precision of 0%, and recall of 0%.

#### 472 ***In Situ* vs. Laboratory Behavior**

473 The maximum normalized ODBA of uninfluenced laboratory periods (median 1.98) tended to be  
474 greater than that of *in situ* uninfluenced periods (median 1.27; Mann-Whitney U test, two-sided  $p <$   
475  $1e-4$ ). Orientation change also tended to be greater over uninfluenced laboratory periods (median  
476 11.6 degrees) than over uninfluenced *in situ* periods (median 5.6 degrees; Mann Whitney U test,  
477 two-sided  $p < 1e-4$ ). Note that test tank walls were not responsible for turning behavior, since the  
478 tether length prevented jellyfish from reaching the walls.

#### 479 **Discussion**

480 Our work provides a pipeline for interpreting fine-scale *in situ* behavior of a zooplankton species  
481 (*Chrysaora fuscescens*) over long durations. Our approach of combining biologging with  
482 supervised ML methods yields records of *in situ* activity and orientation of individual jellyfish for  
483 several hours (up to 10 h so far), and may include the first successful *in situ* deployments of  
484 magnetometers and gyroscopes on jellyfish. Using our activity classifier, our estimates of animals'  
485 *in situ* swimming activity on unannotated durations (on average 96.4% of the time; Table S3) is  
486 compatible with swimming in our annotated footage (on average 98.7% of behavior not annotated  
487 as unknown; Table S2). These long periods of sustained swimming with limited bouts of drifting



488 are consistent with activity budget estimates of other oblate jellyfish (Colin et al., 2003; Costello  
489 et al., 1998), whose rowing mode of propulsion has been shown to be energy-efficient (Dabiri et  
490 al., 2010; Gemmell et al., 2018). In spite of tether influence, uninfluenced periods of data also  
491 revealed that tagged animals underwent stereotypical vertical excursions (Fig. 3A; Hays et al.,  
492 2012). Though future studies of fine-scale zooplankton behavior would be best conducted with  
493 tetherless tag retrieval methods, our approach provides a reasonably precise solution for  
494 detecting this influence and removing it, since it may compromise findings on *in situ* energetics  
495 and orientation (Fig. 2B, C; Fossette et al., 2015; Hays et al., 2008).

496 Our findings also highlight the importance of collecting *in situ* biologging data, rather than  
497 captive laboratory data, for developing behavioral classification methods. An assumption  
498 fundamental to justifying the deployment of machine learning (ML) methods, is that the data seen  
499 during training and inference are drawn from the same underlying distribution (Pan and Yang,  
500 2010; Sugiyama et al., 2007; Zhang et al., 2013). Classifiers for interpreting accelerometry data,  
501 however, have been overwhelmingly trained and validated on laboratory data (Carroll et al.,  
502 2014). In doing this, these studies implicitly assume that behavioral data generated in the  
503 laboratory is distributionally similar to *in situ* behavioral data. Our findings suggest that this  
504 assumption has limited applicability, even for organisms displaying simple behaviors like  
505 swimming or drifting. First, basic descriptive statistics differed significantly between laboratory  
506 and *in situ* data: jellyfish pulses induced greater orientation changes and greater ODBA in the  
507 laboratory than *in situ*. Second, the activity classifier trained and validated solely on laboratory  
508 data had optimistic estimates of precision and recall, but performed poorly with zero precision  
509 and recall when evaluated on *in situ* data. We highlight this as a cautionary tale against naively  
510 deploying ML classifiers developed on laboratory data in the field. As biologging moves forward,  
511 methods involving technologies that capture the behavioral ground truth of *in situ* data, such as  
512 camera tags, are strongly encouraged.

513 Our work also underscores the limitations of ODBA in characterizing even simple *in situ*  
514 behaviors. ODBA thresholding yielded zero precision and recall in classifying *in situ* swimming  
515 and drifting, but performed reasonably well when trained and evaluated on laboratory activity.  
516 This suggests that the standard way of computing ODBA may not be robust to dynamic and  
517 unpredictable sources of noise in *in situ* data (Shepard et al., 2008). Beyond accelerometry, our  
518 results also show that leveraging information from other sensors (e.g. gyroscope) can improve *in*  
519 *situ* behavioral classification considerably. Looking forward, our methods open the door to  
520 investigating more complex questions about fine-scale zooplankton behavior, such as how these



521 species orient themselves in a current, whether they exhibit rolling behavior or lateral  
522 preferences (Fig. 3), and whether their behavioral patterns distinguish them from passive drifters.

## 523 **Acknowledgments**

524 We are grateful to Jared Figurski, Joost Daniels, Chris Wahl, William Gough, James Fahlbusch,  
525 Jeremy Goldbogen, Rob Sherlock, Steve Haddock, Chad Keczy, Tom O'Reilly, and Ivan Masmitja  
526 for guidance and assistance in the field, and to David Cade for calibration and orientation  
527 estimation tools. This work was supported by the David and Lucile Packard Foundation (to Katija),  
528 the WHOI Green Innovation Award (to Mooney, Katija, and Shorter), and NSF-DBI Collaborative  
529 awards 1455593 (to Mooney and Shorter) and 1455501 (to Katija).

## 530 **References**

- 531 **Ambrose, C. and McLachlan, G. J.** (2002). Selection bias in gene extraction on the basis of  
532 microarray gene-expression data. *Proc. Natl. Acad. Sci. U. S. A.* **99**, 6562–6566.
- 533 **Båmstedt, U., Kaartvedt, S. and Youngbluth, M.** (2003). An evaluation of acoustic and video  
534 methods to estimate the abundance and vertical distribution of jellyfish. *J. Plankton Res.*  
535 **25**, 1307–1318.
- 536 **Block, B. A., Jonsen, I. D., Jorgensen, S. J., Winship, A. J., Shaffer, S. A., Bograd, S. J., Hazen, E.**  
537 **L., Foley, D. G., Breed, G. A., Harrison, A.-L., et al.** (2011). Tracking apex marine predator  
538 movements in a dynamic ocean. *Nature* **475**, 86–90.
- 539 **Blockeel, H., Kersting, K., Nijssen, S. and Železný, F. eds.** (2013). *Machine Learning and*  
540 *Knowledge Discovery in Databases: European Conference, ECML PKDD 2013, Prague,*  
541 *Czech Republic, September 23-27, 2013, Proceedings, Part III.* Springer, Berlin,  
542 Heidelberg.
- 543 **Boyd, K., Eng, K. H. and Page, C. D.** (2013). Area under the Precision-Recall Curve: Point  
544 Estimates and Confidence Intervals. In *Machine Learning and Knowledge Discovery in*  
545 *Databases*, pp. 451–466. Springer Berlin Heidelberg.
- 546 **Brewster, L. R., Dale, J. J., Guttridge, T. L., Gruber, S. H., Hansell, A. C., Elliott, M., Cowx, I. G.,**  
547 **Whitney, N. M. and Gleiss, A. C.** (2018). Development and application of a machine  
548 learning algorithm for classification of elasmobranch behaviour from accelerometry data.  
549 *Mar. Biol.* **165**, 62.

- 550 **Brown, D. D., Kays, R., Wikelski, M., Wilson, R. and Klimley, A. P.** (2013). Observing the  
551 unwatchable through acceleration logging of animal behavior. *Animal Biotelemetry* **1**, 20.
- 552 **Bunescu, R., Ge, R., Kate, R. J., Marcotte, E. M., Mooney, R. J., Ramani, A. K. and Wong, Y. W.**  
553 (2005). Comparative experiments on learning information extractors for proteins and their  
554 interactions. *Artif. Intell. Med.* **33**, 139–155.
- 555 **Carroll, G., Slip, D., Jonsen, I. and Harcourt, R.** (2014). Supervised accelerometry analysis can  
556 identify prey capture by penguins at sea. *J. Exp. Biol.* **217**, 4295–4302.
- 557 **Cawley, G. C. and Talbot, N. L. C.** (2010). On Over-fitting in Model Selection and Subsequent  
558 Selection Bias in Performance Evaluation. *J. Mach. Learn. Res.* **11**, 2079–2107.
- 559 **Colin, S. P. and Costello, J. H.** (2002). Morphology, swimming performance and propulsive mode  
560 of six co-occurring hydromedusae. *J. Exp. Biol.* **205**, 427–437.
- 561 **Colin, S. P., Costello, J. H. and Klos, E.** (2003). In situ swimming and feeding behavior of eight  
562 co-occurring hydromedusae. *Mar. Ecol. Prog. Ser.* **253**, 305–309.
- 563 **Costello, J. H., Klos, E. and Ford** (1998). In situ time budgets of the scyphomedusae *Aurelia*  
564 *aurita*, *Cyanea* sp., and *Chrysaora quinquecirrha*. *J. Plankton Res.* **20**, 383–391.
- 565 **Dabiri, J. O., Colin, S. P., Katija, K. and Costello, J. H.** (2010). A wake-based correlate of  
566 swimming performance and foraging behavior in seven co-occurring jellyfish species. *J.*  
567 *Exp. Biol.* **213**, 1217–1225.
- 568 **Dash, M. and Liu, H.** (1997). Feature selection for classification. *Intelligent Data Analysis* **1**,  
569 131–156.
- 570 **Davis, J. and Goadrich, M.** (2006). The Relationship Between Precision-Recall and ROC Curves.  
571 In *Proceedings of the 23rd International Conference on Machine Learning*, pp. 233–240.  
572 New York, NY, USA: ACM.
- 573 **Diebel, J.** (2006). Representing attitude: Euler angles, unit quaternions, and rotation vectors.  
574 *Matrix* **58**, 1–35.
- 575 **Duarte, M.** (2013). *Notes on Scientific Computing for Biomechanics and Motor Control*. Github.
- 576 **Duda, R. O., Hart, P. E. and Stork, D. G.** (2000). *Pattern Classification (2Nd Edition)*. New York,  
577 NY, USA: Wiley-Interscience.
- 578 **Fisher, R. A.** (1936). The use of multiple measurements in taxonomic problems. *Ann. Eugen.* **7**,  
579 179–188.
- 580 **Fawcett, T.** (2006). An introduction to ROC analysis. *Pattern Recognit. Lett.* **27**, 861–874.

- 581 **Fossette, S., Gleiss, A. C., Chalumeau, J., Bastian, T., Armstrong, C. D., Vandenabeele, S.,**  
582 **Karpytchev, M. and Hays, G. C.** (2015). Current-oriented swimming by jellyfish and its role  
583 in bloom maintenance. *Curr. Biol.* **25**, 342–347.
- 584 **Fossette, S., Katija, K., Goldbogen, J. A., Bograd, S., Patry, W., Howard, M. J., Knowles, T.,**  
585 **Haddock, S. H. D., Bedell, L., Hazen, E. L., et al.** (2016). How to tag a jellyfish? A  
586 methodological review and guidelines to successful jellyfish tagging. *J. Plankton Res.* **38**,  
587 1347–1363.
- 588 **Gemmell, B. J., Colin, S. P. and Costello, J. H.** (2018). Widespread utilization of passive energy  
589 recapture in swimming medusae. *J. Exp. Biol.* **221**.
- 590 **Gleiss, A. C., Wilson, R. P. and Shepard, E. L. C.** (2011). Making overall dynamic body acceleration  
591 work: on the theory of acceleration as a proxy for energy expenditure: Acceleration as a  
592 proxy for energy expenditure. *Methods Ecol. Evol.* **2**, 23–33.
- 593 **Goldbogen, J. A., Calambokidis, J., Shadwick, R. E., Oleson, E. M., McDonald, M. A. and**  
594 **Hildebrand, J. A.** (2006). Kinematics of foraging dives and lunge-feeding in fin whales. *J.*  
595 *Exp. Biol.* **209**, 1231–1244.
- 596 **Guyon, I. and Elisseeff, A.** (2003). An Introduction to Variable and Feature Selection. *J. Mach.*  
597 *Learn. Res.* **3**, 1157–1182.
- 598 **Halsey, L. G., Green, J. A., Wilson, R. P. and Frappell, P. B.** (2009). Accelerometry to Estimate  
599 Energy Expenditure during Activity: Best Practice with Data Loggers. *Physiol. Biochem.*  
600 *Zool.* **82**, 396–404.
- 601 **Hastie, T., Tibshirani, R. and Friedman, J.** (2009). *The Elements of Statistical Learning: Data*  
602 *Mining, Inference, and Prediction*. Springer Science & Business Media.
- 603 **Hays, G. C., Doyle, T. K., Houghton, J. D. R., Lilley, M. K. S., Metcalfe, J. D. and Righton, D.**  
604 (2008). Diving behaviour of jellyfish equipped with electronic tags. *J. Plankton Res.* **30**,  
605 325–331.
- 606 **Hays Graeme C., Bastian Thomas, Doyle Thomas K., Fossette Sabrina, Gleiss Adrian C.,**  
607 **Gravenor Michael B., Hobson Victoria J., Humphries Nicolas E., Lilley Martin K. S., Pade**  
608 **Nicolas G., et al.** (2012). High activity and Lévy searches: jellyfish can search the water  
609 column like fish. *Proceedings of the Royal Society B: Biological Sciences* **279**, 465–473.
- 610 **Hays, G. C., Ferreira, L. C., Sequeira, A. M. M., Meekan, M. G., Duarte, C. M., Bailey, H., Bailleul,**  
611 **F., Bowen, W. D., Caley, M. J., Costa, D. P., et al.** (2016). Key Questions in Marine  
612 Megafauna Movement Ecology. *Trends Ecol. Evol.* **31**, 463–475.

- 613 **Honda, N., Watanabe, T. and Matsushita, Y.** (2009). Swimming depths of the giant jellyfish  
614 *Nemopilema nomurai* investigated using pop-up archival transmitting tags and ultrasonic  
615 pingers. *Fish. Sci.* **75**, 947–956.
- 616 **Hurley, N. and Rickard, S.** (2009). Comparing Measures of Sparsity. *IEEE Trans. Inf. Theory* **55**,  
617 4723–4741.
- 618 **Jeantet, L., Dell’Amico, F., Forin-Wiart, M.-A., Coutant, M., Bonola, M., Etienne, D., Gresser, J.,**  
619 **Regis, S., Lecerf, N., Lefebvre, F., et al.** (2018). Combined use of two supervised learning  
620 algorithms to model sea turtle behaviours from tri-axial acceleration data. *J. Exp. Biol.* **221**.
- 621 **Johnson, M. P. and Tyack, P. L.** (2003). A digital acoustic recording tag for measuring the  
622 response of wild marine mammals to sound. *IEEE J. Oceanic Eng.* **28**, 3–12.
- 623 **Kaartvedt, S., Klevjer, T. A., Torgersen, T., Sørnes, T. A. and Røstad, A.** (2007). Diel vertical  
624 migration of individual jellyfish (*Periphylla periphylla*). *Limnol. Oceanogr.* **52**, 975–983.
- 625 **Kaartvedt, S., Ugland, K. I., Klevjer, T. A., Røstad, A., Titelman, J. and Solberg, I.** (2015). Social  
626 behaviour in mesopelagic jellyfish. *Sci. Rep.* **5**, 11310.
- 627 **Klevjer, T. A., Kaartvedt, S. and Båmstedt, U.** (2009). In situ behaviour and acoustic properties of  
628 the deep living jellyfish *Periphylla periphylla*. *J. Plankton Res.* **31**, 793–803.
- 629 **Kohavi, R.** (1995). A Study of Cross-validation and Bootstrap for Accuracy Estimation and Model  
630 Selection. In *Proceedings of the 14th International Joint Conference on Artificial*  
631 *Intelligence - Volume 2*, pp. 1137–1143. San Francisco, CA, USA: Morgan Kaufmann  
632 Publishers Inc.
- 633 **Kooyman, G. L.** (2004). Genesis and evolution of bio-logging devices: 1963–2002. *Mem. Natl*  
634 *Inst. Polar Res., Spec. Issue* **58**, 15–22.
- 635 **Ladds, M. A., Thompson, A. P., Slip, D. J., Hocking, D. P. and Harcourt, R. G.** (2016). Seeing It All:  
636 Evaluating Supervised Machine Learning Methods for the Classification of Diverse Otariid  
637 Behaviours. *PLoS One* **11**, e0166898.
- 638 **Liu, H. and Motoda, H.** (1998). *Feature Selection for Knowledge Discovery and Data Mining*.  
639 Springer Science & Business Media.
- 640 **MacKay, D. J. C. and Mac, D. J.** (2003). *Information Theory, Inference and Learning Algorithms*.  
641 Cambridge University Press.
- 642 **Manning, C. D. and Schütze, H.** (1999). *Foundations of Statistical Natural Language Processing*.  
643 MIT Press.

- 644 **Martín López, L. M., Aguilar de Soto, N., Miller, P. and Johnson, M.** (2016). Tracking the  
645 kinematics of caudal-oscillatory swimming: a comparison of two on-animal sensing  
646 methods. *J. Exp. Biol.* **219**, 2103–2109.
- 647 **Matanoski, J., Hood, R. and Purcell, J.** (2001). Characterizing the effect of prey on swimming and  
648 feeding efficiency of the scyphomedusa *Chrysaora quinquecirrha*. *Mar. Biol.* **139**, 191–200.
- 649 **Mills, C. E.** (1984). Density is altered in hydromedusae and ctenophores in response to changes  
650 in salinity. *Biol. Bull.* **166**, 206–215.
- 651 **Mooney, T. A., Katija, K., Shorter, K. A., Hurst, T., Fontes, J. and Afonso, P.** (2015). ITAG: an  
652 eco-sensor for fine-scale behavioral measurements of soft-bodied marine invertebrates.  
653 *Animal Biotelemetry* **3**, 31.
- 654 **Moriarty, P. E., Andrews, K. S., Harvey, C. J. and Kawase, M.** (2012). Vertical and horizontal  
655 movement patterns of scyphozoan jellyfish in a fjord-like estuary. *Mar. Ecol. Prog. Ser.*  
656 **455**, 1–12.
- 657 **Pan, S. J. and Yang, Q.** (2010). A Survey on Transfer Learning. *IEEE Trans. Knowl. Data Eng.* **22**,  
658 1345–1359.
- 659 **Purcell, J. E.** (2009). Extension of methods for jellyfish and ctenophore trophic ecology to  
660 large-scale research. *Hydrobiologia* **616**, 23–50.
- 661 **Rasmussen, K., Palacios, D. M., Calambokidis, J., Saborío, M. T., Dalla Rosa, L., Secchi, E. R.,**  
662 **Steiger, G. H., Allen, J. M. and Stone, G. S.** (2007). Southern Hemisphere humpback  
663 whales wintering off Central America: insights from water temperature into the longest  
664 mammalian migration. *Biol. Lett.* **3**, 302–305.
- 665 **Reunanen, J.** (2003). Overfitting in Making Comparisons Between Variable Selection Methods. *J.*  
666 *Mach. Learn. Res.* **3**, 1371–1382.
- 667 **Richardson, M. and Domingos, P.** (2006). Markov logic networks. *Mach. Learn.* **62**, 107–136.
- 668 **Rife, J. and Rock, S. M.** (2003). Segmentation methods for visual tracking of deep-ocean jellyfish  
669 using a conventional camera. *IEEE J. Oceanic Eng.* **28**, 595–608.
- 670 **Rutz, C. and Hays, G. C.** (2009). New frontiers in biologging science. *Biol. Lett.* **5**, 289–292.
- 671 **Sato, K., Mitani, Y., Cameron, M. F., Siniff, D. B. and Naito, Y.** (2003). Factors affecting stroking  
672 patterns and body angle in diving Weddell seals under natural conditions. *J. Exp. Biol.*  
673 **206**, 1461–1470.
- 674 **Sequeira, A. M. M., Rodríguez, J. P., Eguíluz, V. M., Harcourt, R., Hindell, M., Sims, D. W.,**  
675 **Duarte, C. M., Costa, D. P., Fernández-Gracia, J., Ferreira, L. C., et al.** (2018).

- 676 Convergence of marine megafauna movement patterns in coastal and open oceans. *Proc.*  
677 *Natl. Acad. Sci. U. S. A.* **115**, 3072–3077.
- 678 **Seymour, J. E., Carrette, T. J. and Sutherland, P. A.** (2004). Do box jellyfish sleep at night? *Med.*  
679 *J. Aust.* **181**, 707.
- 680 **Shepard, E. L. C., Wilson, R. P., Halsey, L. G., Quintana, F., Gómez Laich, A., Gleiss, A. C.,**  
681 **Liebsch, N., Myers, A. E. and Norman, B.** (2008). Derivation of body motion via  
682 appropriate smoothing of acceleration data. *Aquat. Biol.* **4**, 235–241.
- 683 **Sims, D. W., Southall, E. J., Humphries, N. E., Hays, G. C., Bradshaw, C. J. A., Pitchford, J. W.,**  
684 **James, A., Ahmed, M. Z., Brierley, A. S., Hindell, M. A., et al.** (2008). Scaling laws of  
685 marine predator search behaviour. *Nature* **451**, 1098–1102.
- 686 **Smialowski, P., Frishman, D. and Kramer, S.** (2010). Pitfalls of supervised feature selection.  
687 *Bioinformatics* **26**, 440–443.
- 688 **Sugiyama, M., Krauledat, M. and Müller, K.-R.** (2007). Covariate Shift Adaptation by Importance  
689 Weighted Cross Validation. *J. Mach. Learn. Res.* **8**, 985–1005.
- 690 **Varma, S. and Simon, R.** (2006). Bias in error estimation when using cross-validation for model  
691 selection. *BMC Bioinformatics* **7**, 91.
- 692 **Watanabe, Y. Y. and Takahashi, A.** (2013). Linking animal-borne video to accelerometers reveals  
693 prey capture variability. *Proc. Natl. Acad. Sci. U. S. A.* **110**, 2199–2204.
- 694 **Weise, M. J., Harvey, J. T. and Costa, D. P.** (2010). The role of body size in individual-based  
695 foraging strategies of a top marine predator. *Ecology* **91**, 1004–1015.
- 696 **Whitney, A. W.** (1971). A Direct Method of Nonparametric Measurement Selection. *IEEE Trans.*  
697 *Comput.* **C-20**, 1100–1103.
- 698 **Wilson, R. P., White, C. R., Quintana, F., Halsey, L. G., Liebsch, N., Martin, G. R. and Butler, P. J.**  
699 (2006). Moving towards acceleration for estimates of activity-specific metabolic rate in  
700 free-living animals: the case of the cormorant. *J. Anim. Ecol.* **75**, 1081–1090.
- 701 **Zhang, K., Schölkopf, B., Muandet, K. and Wang, Z.** (2013). Domain Adaptation under Target and  
702 Conditional Shift. In *International Conference on Machine Learning*, pp. 819–827.
- 703 **Zonoobi, D., Kassim, A. A. and Venkatesh, Y. V.** (2011). Gini Index as Sparsity Measure for Signal  
704 Reconstruction from Compressive Samples. *IEEE J. Sel. Top. Signal Process.* **5**, 927–932.

705 **Supplementary Information**

706 **Table S1. Summary of laboratory and *in situ* deployments of ITAG on *Chrysaora fuscescens***

| Test tank      | Animal ID | Date deployed | Tag ID | Tag data (sec) | Video footage (sec) | Drogue depth (m) | Location collected       | Date collected      |
|----------------|-----------|---------------|--------|----------------|---------------------|------------------|--------------------------|---------------------|
|                | T1-1      | 18/05/18      | e2     | 2321           | 1916                | N/A              | 36.7968,<br>-121.8298    | 18/05/18            |
|                | T2-1      | 18/05/21      | b7     | 4562           | 2866                | N/A              | 36.7968,<br>-121.8298    | 18/05/18            |
|                | T2-2      | 18/05/21      | e2     | 3110           | 3004                | N/A              | 36.7968,<br>-121.8298    | 18/05/18            |
|                | T3-1      | 18/05/31      | b7     | 4257           | 4044                | N/A              | 36.86749,<br>-121.90273. | 18/04/06            |
| <i>In situ</i> |           |               |        |                |                     |                  | Location deployed        | Time deployed (PST) |
|                | S1-1      | 18/04/24      | 24     | 23479          | 264                 | 5                | 36.8315<br>-121.8767     | 10:42am             |
|                | S1-2      | 18/04/24      | 3c     | 2166           | 614                 | None             | 36.8355,<br>-121.8750    | 11:50am             |
|                | S1-3      | 18/04/24      | e2     | 20571          | 789                 | 9                | 36.8383,<br>-121.8759    | 12:43pm             |
|                | S2-1      | 18/05/14      | 24     | 16893          | 1619                | 9                | 36.8243,<br>-121.9247    | 11:00am             |
|                | S2-2      | 18/05/14      | e2     | 19464          | 1374                | 9                | 36.8219,                 | 12:21pm             |

|  |      |          |    |       |      |   |                       |         |
|--|------|----------|----|-------|------|---|-----------------------|---------|
|  |      |          |    |       |      |   | -121.9234             |         |
|  | S3-1 | 18/05/17 | e2 | 10289 | 1332 | 9 | 36.8397,<br>-121.8854 | 12:42pm |
|  | S3-2 | 18/05/17 | 24 | 2484  | 0    | 9 | 36.8333,<br>-121.8827 | 1:52pm  |
|  | S3-3 | 18/05/17 | b7 | 36400 | 975  | 9 | 36.8302,<br>-121.8790 | 2:21pm  |

707 Footnotes: During the S3-2 deployment, the ROV lost track of the jellyfish almost immediately  
 708 after release due to strong currents and no viable footage of behavior was recorded. In four out  
 709 of the eight deployments (S1-1, S1-3, S3-1, and S3-2), the tag was still attached to the jellyfish at  
 710 the time of retrieval. In the remaining four deployments (S1-2, S2-1, S2-2, and S3-3), the jellyfish  
 711 was no longer attached.

712 **Table S2. Summary of test tank and *in situ* video footage annotations**

| Test tank | Animal ID | Total annotated footage (sec) | Behavior    |              |               | Tether Influence  |                    |               | Unannotated tag data after footage (min) |
|-----------|-----------|-------------------------------|-------------|--------------|---------------|-------------------|--------------------|---------------|------------------------------------------|
|           |           |                               | Drift (sec) | Swim (sec)   | Unknown (sec) | Taut tether (sec) | Slack tether (sec) | Unknown (sec) |                                          |
|           | T1-1      | 1916                          | 0           | 1916 (100%)  | 0             | 1093 (57.0%)      | 816 (42.6%)        | 7 (0.4%)      | N/A                                      |
|           | T2-1      | 2866                          | 55 (1.9%)   | 2811 (98.1%) | 0             | 575 (20.1%)       | 2253 (78.6%)       | 38 (1.3%)     | N/A                                      |
|           | T2-2      | 3004                          | 4 (0.1%)    | 3000 (99.9%) | 0             | 550 (18.3%)       | 2454 (81.7%)       | 0             | N/A                                      |



|                      |      |       |               |                  |                |                 |                 |                 |      |
|----------------------|------|-------|---------------|------------------|----------------|-----------------|-----------------|-----------------|------|
|                      | T3-1 | 4044  | 311<br>(7.7%) | 3733<br>(92.3%)  | 0              | 0               | 4044 (100%)     | 0               | N/A  |
| Total test tank      |      | 11830 | 370<br>(3.1%) | 11460<br>(96.9%) | 0              | 2218<br>(18.7%) | 9567<br>(80.9%) | 45 (0.4%)       | N/A  |
| <i>In situ</i>       | S1-1 | 154   | 0             | 154<br>(100%)    | 0              | 24 (15.6%)      | 102 (66.2%)     | 28 (18.2%)      | 388  |
|                      | S1-2 | 590   | 3<br>(0.5%)   | 350<br>(59.3%)   | 237<br>(40.2%) | 25 (4.2%)       | 136 (23.1%)     | 429 (72.7%)     | 37   |
|                      | S1-3 | 653   | 5<br>(0.8%)   | 631<br>(96.6%)   | 17 (2.6%)      | 127 (19.4%)     | 207 (31.7%)     | 319 (48.9%)     | 339  |
|                      | S2-1 | 1431  | 7<br>(0.5%)   | 1415<br>(98.9%)  | 9 (0.6%)       | 0               | 727 (50.8%)     | 704 (49.2%)     | 262  |
|                      | S2-2 | 1347  | 0             | 1347<br>(100%)   | 0              | 0               | 1285 (95.4%)    | 62 (4.6%)       | 311  |
|                      | S3-1 | 1158  | 31<br>(2.7%)  | 1116<br>(96.4%)  | 11 (0.9%)      | 69 (6.0%)       | 285 (24.6%)     | 804 (69.4%)     | 146  |
|                      | S3-2 | 0     | N/A           | N/A              | N/A            | N/A             | N/A             | N/A             | 54   |
|                      | S3-3 | 762   | 33<br>(4.3%)  | 721<br>(94.6%)   | 8 (1.0%)       | 80 (10.5%)      | 83 (10.9%)      | 599 (78.6%)     | 590  |
| Total <i>in situ</i> |      | 6095  | 79<br>(1.3%)  | 5734<br>(94.1%)  | 282<br>(4.6%)  | 325 (5.3%)      | 2825<br>(46.3%) | 2945<br>(48.3%) | 2127 |

713 **Table S3. Tether-influence and activity classification results for individual jellyfish**

| Deployment ID | Representative pulse frequency (pulses/sec) | Unannotated data* classified as influenced | Unannotated data* classified as drifting (out of time classified as uninfluenced) |
|---------------|---------------------------------------------|--------------------------------------------|-----------------------------------------------------------------------------------|
|---------------|---------------------------------------------|--------------------------------------------|-----------------------------------------------------------------------------------|

|      |       |       |       |
|------|-------|-------|-------|
| S1-1 | 0.260 | 35.1% | 19.1% |
| S1-2 | 0.487 | 21.2% | 0%    |
| S1-3 | 0.615 | 6.0%  | 0.9%  |
| S2-1 | 0.520 | 3.3%  | 0%    |
| S2-2 | 0.466 | 5.0%  | 0.1%  |
| S3-1 | 0.275 | 28.2% | 5.6%  |
| S3-2 | 0.422 | 9.8%  | 0.6%  |
| S3-3 | 0.380 | 11.4% | 2.7%  |

714 \* Rightmost column of Table S2.

715 **Movie S1. Examples of annotated *in situ* and laboratory footage.** In order, uninfluenced *in situ*  
716 swimming, tether-influenced *in situ* swimming, *in situ* swimming with unknown tether status,  
717 uninfluenced *in situ* drifting, tether-influenced *in situ* drifting, and swimming and drifting in the  
718 MBARI Test Tank.
